# Supplementary material for: The potential global cost-effectiveness of prospective Strep A vaccines and associated implementation efforts
Source: PubMed Central journal article supplement (PMC10457324; doi:10.1038/s41541-023-00718-7), 2023-08-25

## Supplementary information

**Supplementary Table 1. Threshold costs per fully vaccinated person to be cost-effective and cost-saving (default efficacy rates scenario)**

| Income group | RT Age cohort | Threshold cost per fully vaccinated person |         |          |          |            |         |                |         |          |          |            |         |                   |        |          |          |            |         |
|--------------|---------------|--------------------------------------------|---------|----------|----------|------------|---------|----------------|---------|----------|----------|------------|---------|-------------------|--------|----------|----------|------------|---------|
|              |               | To be cost-effective at varying thresholds |         |          |          |            |         |                |         |          |          |            |         | To be cost-saving |        |          |          |            |         |
|              |               | Health opportunity costs                   |         |          |          |            |         | GPD per capita |         |          |          |            |         |                   |        |          |          |            |         |
|              |               | Pharyngitis                                | RHD     | Invasive | Impetigo | Cellulitis | All     | Pharyngitis    | RHD     | Invasive | Impetigo | Cellulitis | All     | Pharyngitis       | RHD    | Invasive | Impetigo | Cellulitis | All     |
| HIC          | rt0           | \$143.7                                    | \$7.0   | \$67.1   | \$152.9  | \$28.5     | \$399.3 | \$142.4        | \$5.8   | \$55.9   | \$152.8  | \$28.3     | \$385.2 | \$137.0           | \$0.4  | \$8.0    | \$152.2  | \$27.3     | \$324.9 |
| HIC          | rt5           | \$311.0                                    | \$8.2   | \$15.9   | \$132.9  | \$28.3     | \$496.3 | \$308.3        | \$6.7   | \$13.2   | \$132.8  | \$28.0     | \$489.0 | \$296.4           | \$0.5  | \$1.7    | \$132.3  | \$27.0     | \$458.0 |
| UMIC         | rt0           | \$28.8                                     | \$82.6  | \$7.1    | \$32.5   | \$0.9      | \$151.8 | \$29.3         | \$139.2 | \$11.2   | \$32.5   | \$0.9      | \$213.1 | \$28.2            | \$10.3 | \$1.9    | \$32.4   | \$0.9      | \$73.6  |
| UMIC         | rt5           | \$62.6                                     | \$128.7 | \$1.7    | \$28.3   | \$0.8      | \$222.0 | \$63.7         | \$216.3 | \$2.6    | \$28.3   | \$0.8      | \$311.7 | \$61.3            | \$16.8 | \$0.4    | \$28.2   | \$0.7      | \$107.5 |
| LMIC         | rt0           | \$17.4                                     | \$13.8  | \$1.1    | \$3.1    | \$0.3      | \$35.7  | \$17.7         | \$50.3  | \$2.9    | \$3.1    | \$0.3      | \$74.3  | \$17.4            | \$7.4  | \$0.8    | \$3.1    | \$0.3      | \$29.0  |
| LMIC         | rt5           | \$38.6                                     | \$25.0  | \$0.3    | \$2.7    | \$0.3      | \$66.9  | \$39.1         | \$88.9  | \$0.7    | \$2.7    | \$0.3      | \$131.8 | \$38.5            | \$13.8 | \$0.2    | \$2.7    | \$0.3      | \$55.4  |
| LIC          | rt0           | \$7.6                                      | \$9.3   | \$0.5    | \$1.3    | \$0.1      | \$18.8  | \$7.7          | \$26.9  | \$1.0    | \$1.3    | \$0.1      | \$37.1  | \$7.6             | \$5.1  | \$0.4    | \$1.3    | \$0.1      | \$14.5  |
| LIC          | rt5           | \$17.0                                     | \$17.6  | \$0.1    | \$1.2    | \$0.1      | \$36.0  | \$17.1         | \$50.0  | \$0.2    | \$1.2    | \$0.1      | \$68.7  | \$16.9            | \$9.9  | \$0.1    | \$1.2    | \$0.1      | \$28.2  |

**Supplementary Figure 1. Threshold cost per fully vaccinated person to be cost-effective by income group**

**Scenario 2**

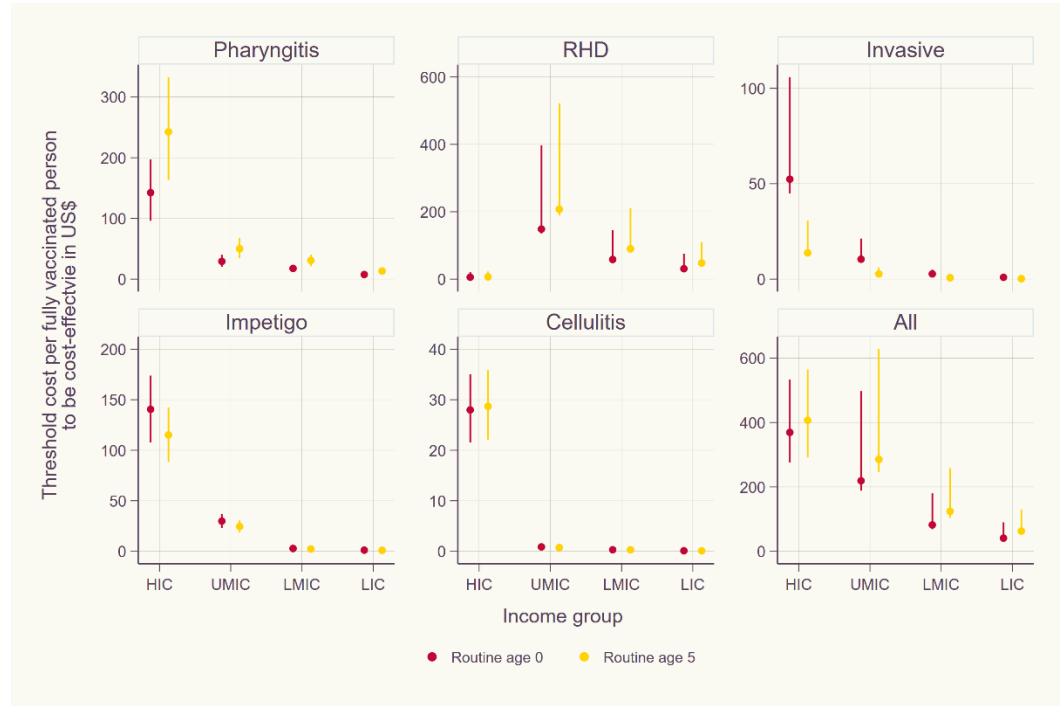

**Scenario 3**

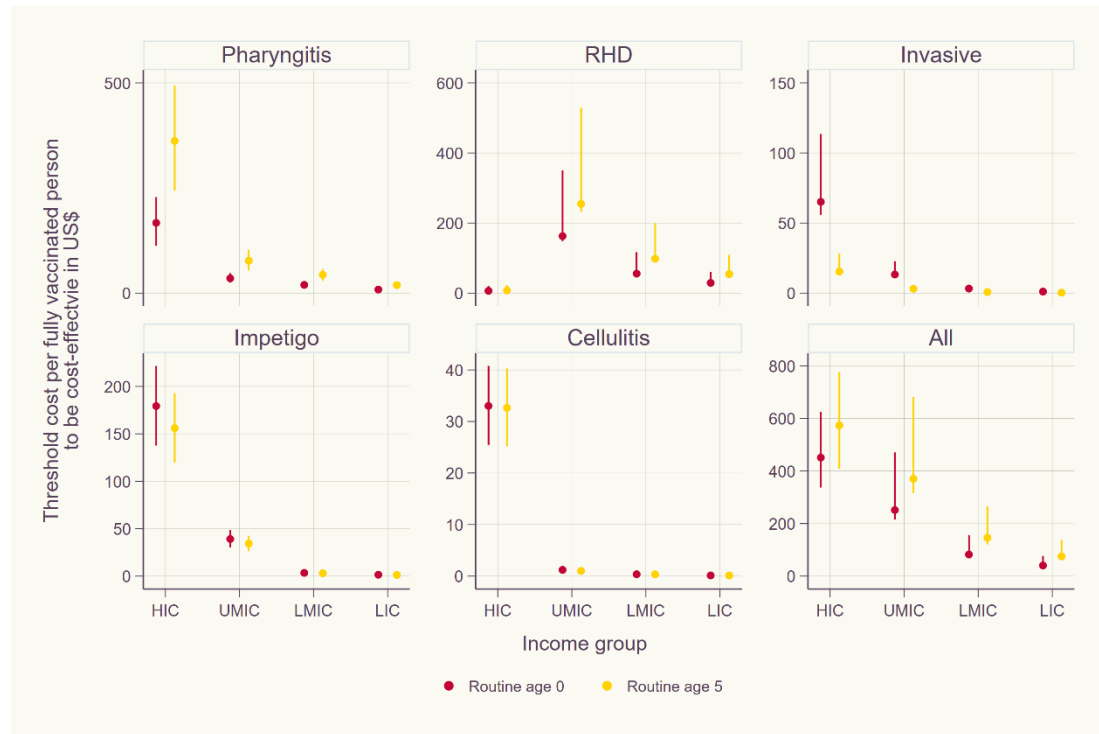

### Scenario 4

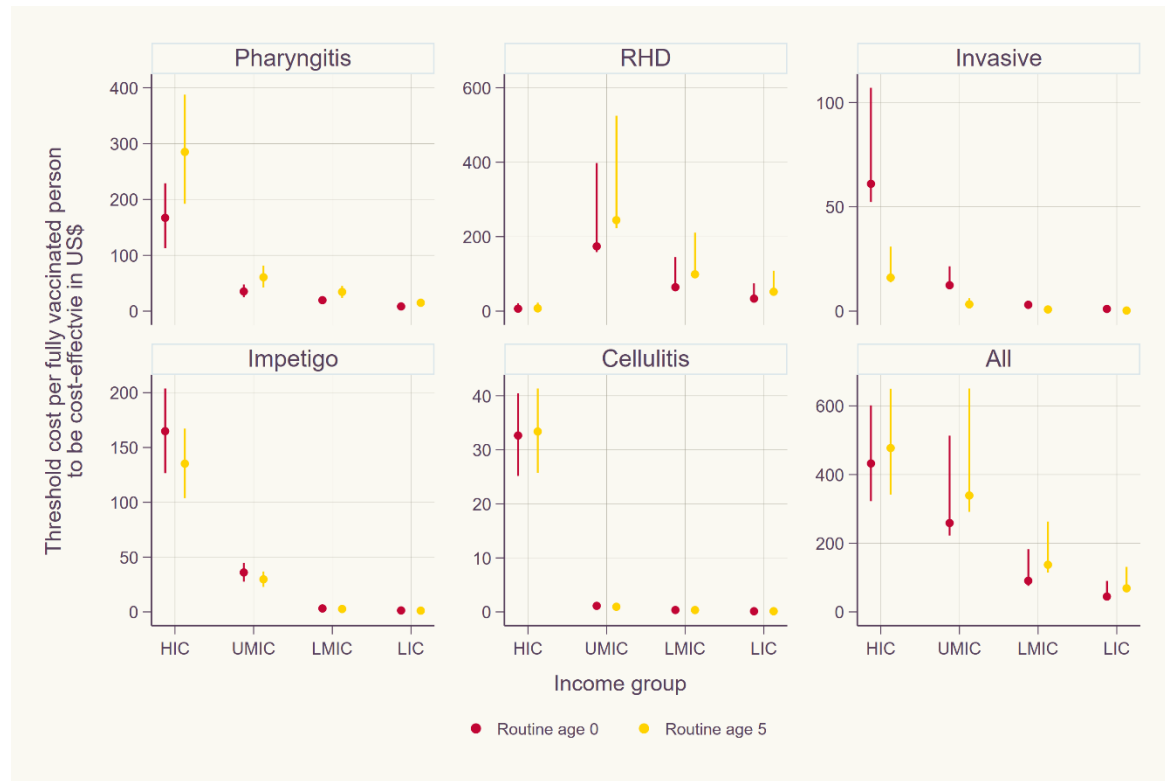

### Scenario 5

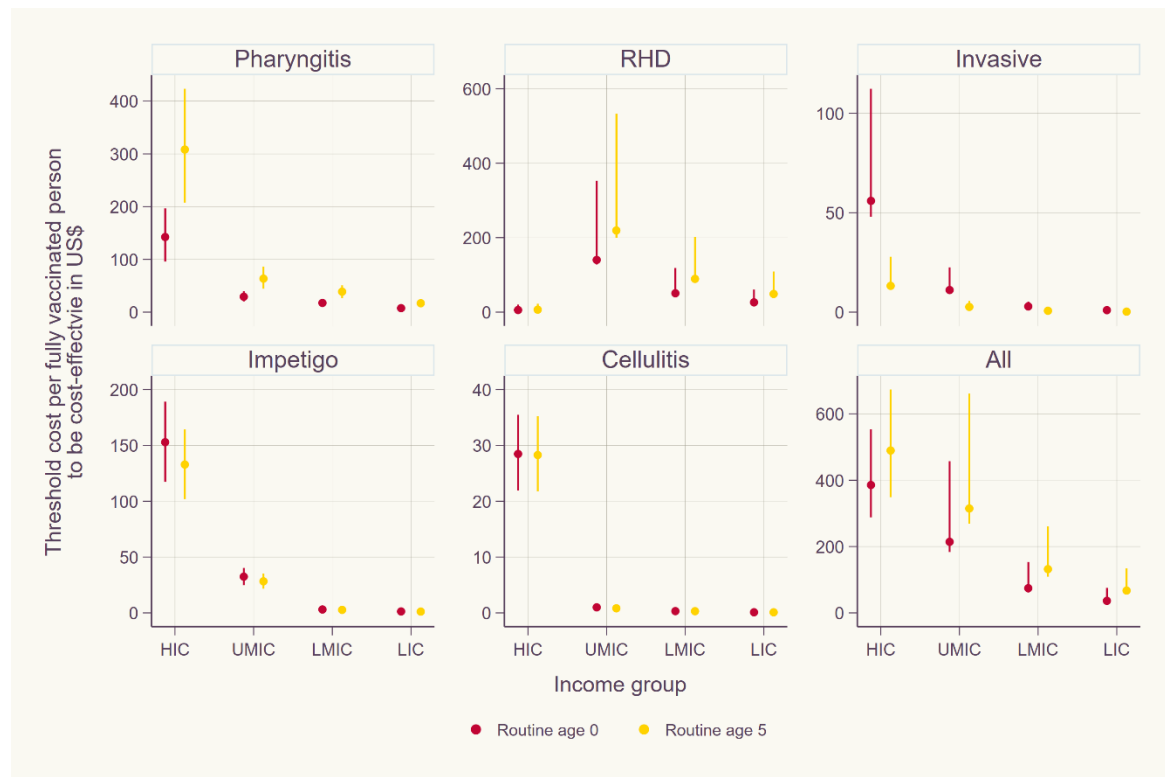

## Scenario 6

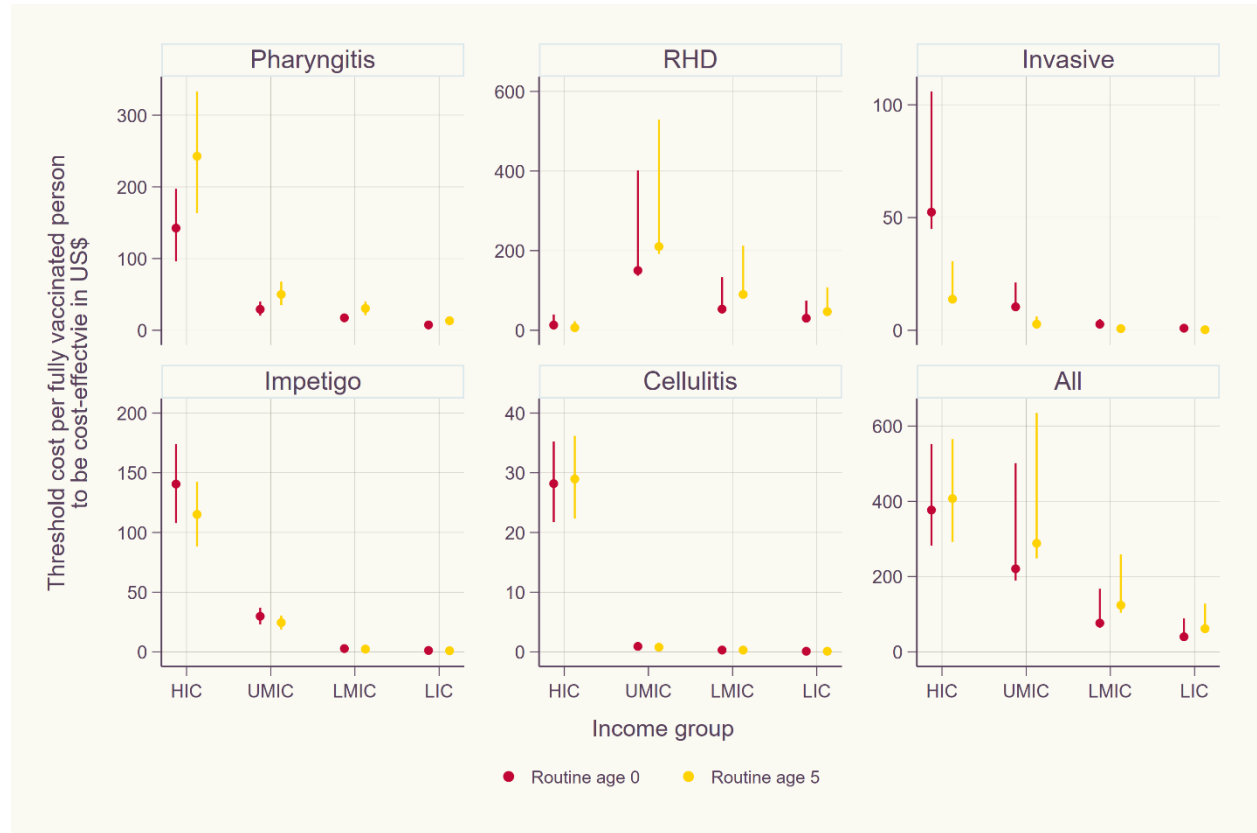

**Supplementary Figure 2. Threshold cost per fully vaccinated person to be cost-effective by scenario: 20% reduction of the default efficacy rate scenario**

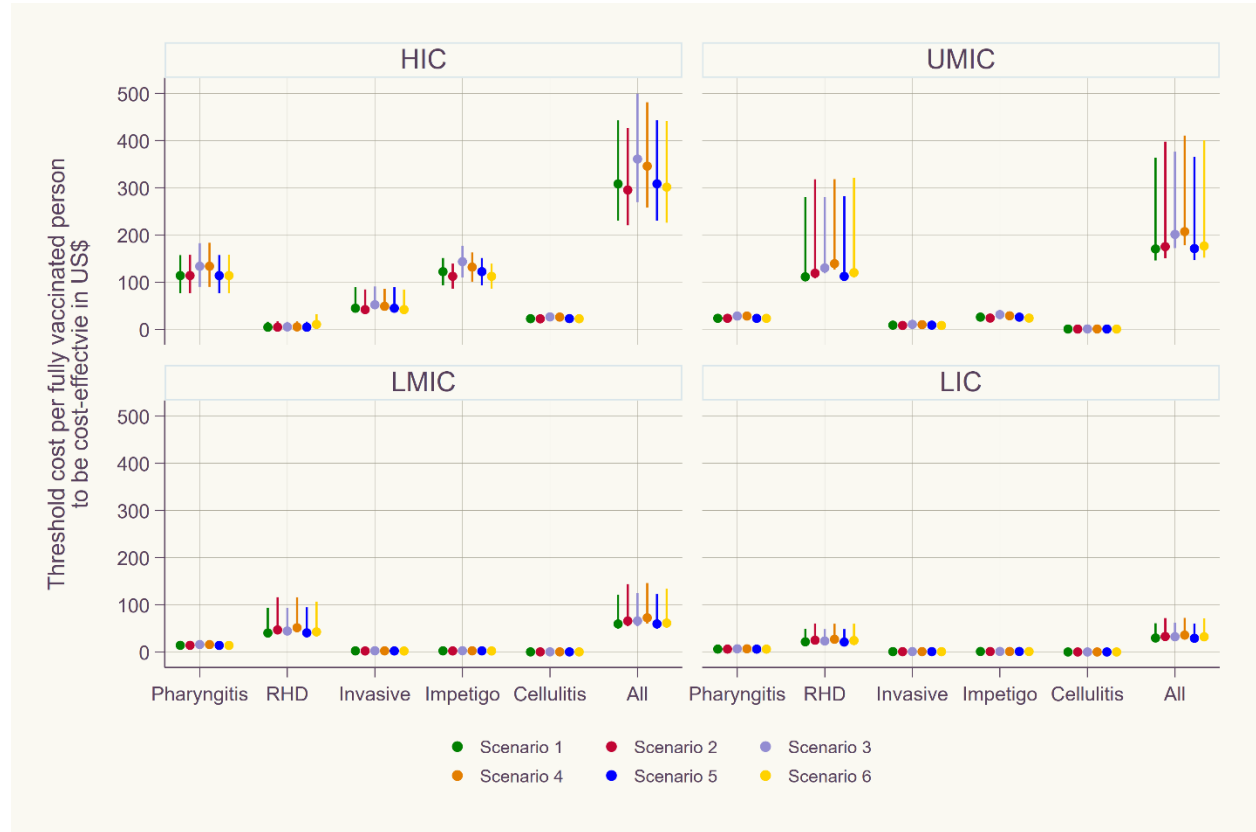

The lower bounds are based on the least favorable scenario: 20% wastage rate, lower bound of economic burden, and 3% discounting of health outcomes. The upper bounds are for the most favorable scenario: 5% wastage rate, upper bound of economic burden, and 0% discounting of health outcomes.

**Supplementary Figure 3. Threshold cost per fully vaccinated person to be cost-effective by scenario: 40% reduction of the default efficacy rate scenario**

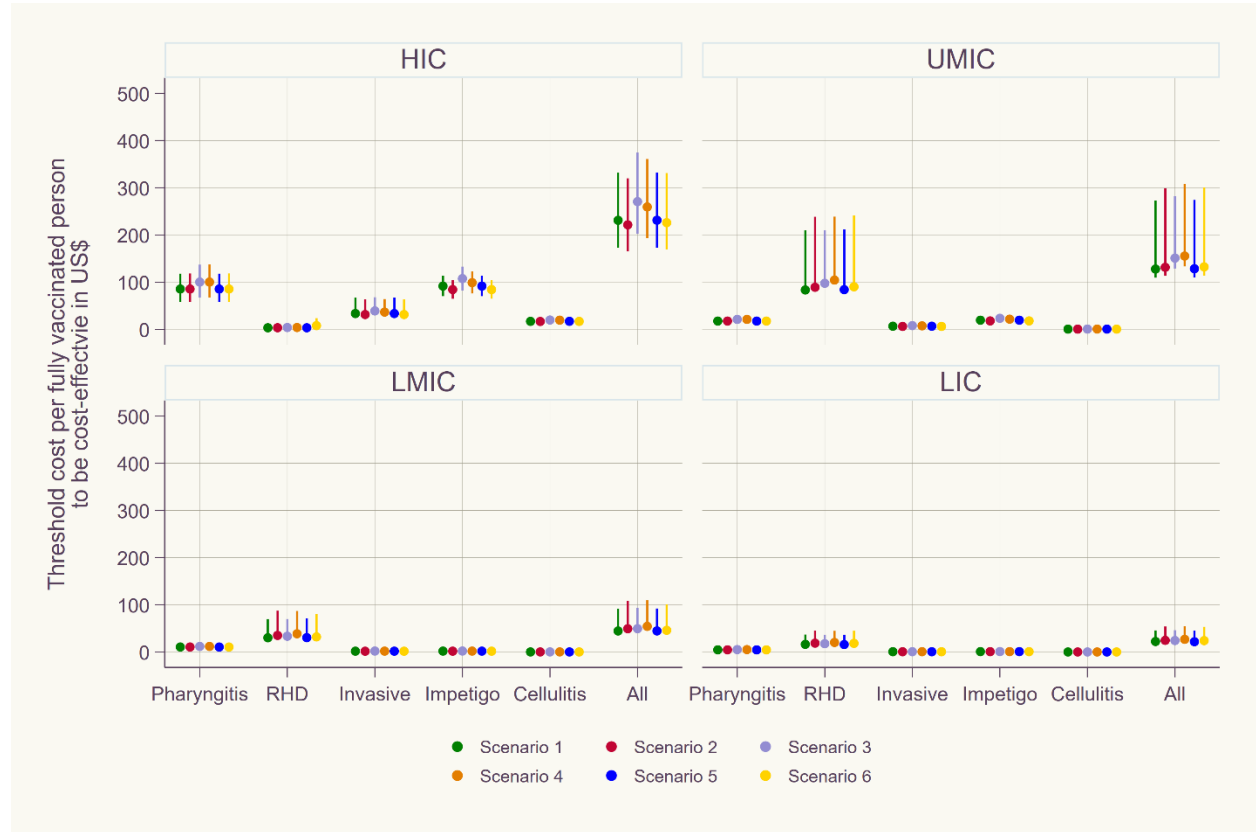

The lower bounds are based on the least favorable scenario: 20% wastage rate, lower bound of economic burden, and 3% discounting of health outcomes. The upper bounds are for the most favorable scenario: 5% wastage rate, upper bound of economic burden, and 0% discounting of health outcomes.

**Supplementary Figure 4. Threshold cost per fully vaccinated person to be cost-effective by scenario: 60% reduction of the default efficacy rate scenario**

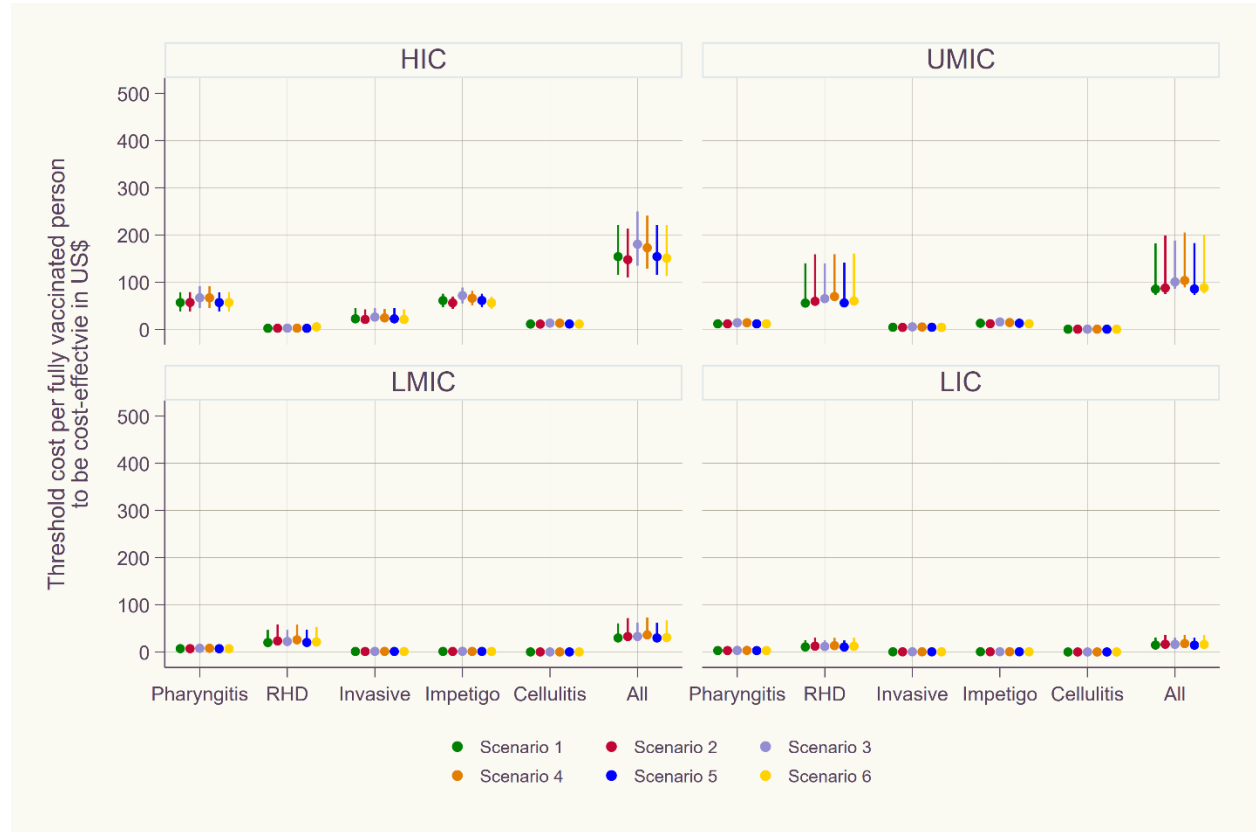

The lower bounds are based on the least favorable scenario: 20% wastage rate, lower bound of economic burden, and 3% discounting of health outcomes. The upper bounds are for the most favorable scenario: 5% wastage rate, upper bound of economic burden, and 0% discounting of health outcomes.

## Supplementary Figure 5. Additional univariate analyses

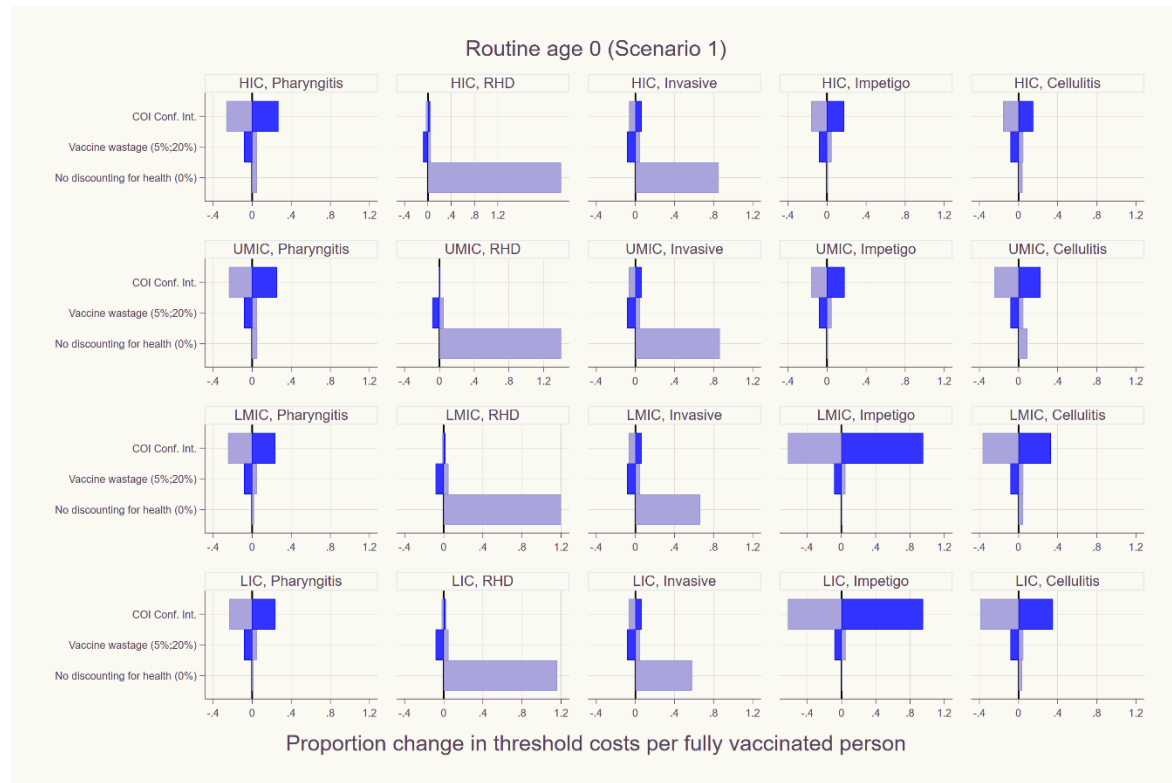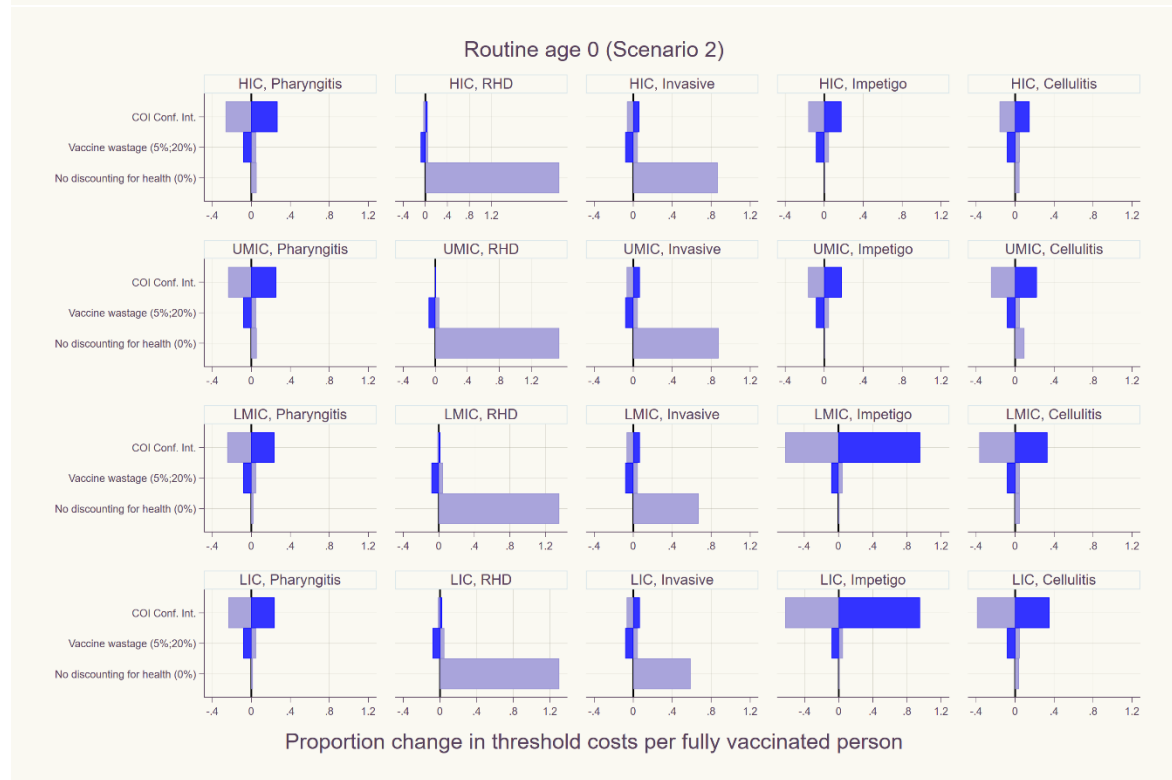



### Routine age 0 (Scenario 3)

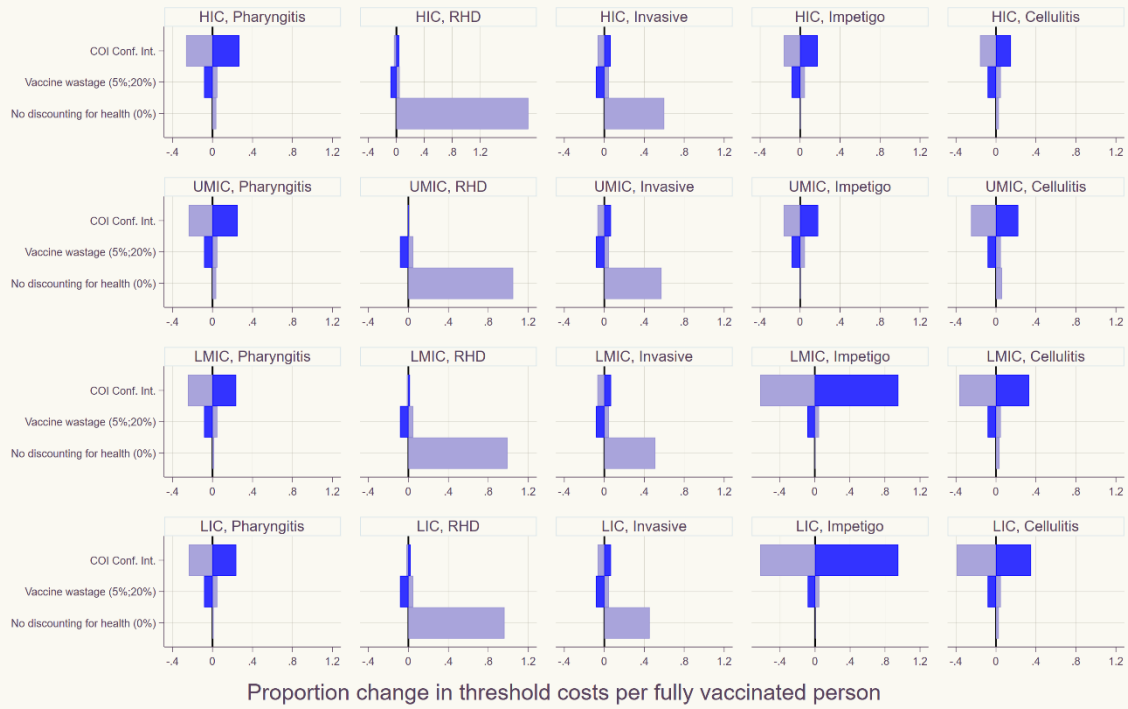

### Routine age 0 (Scenario 4)

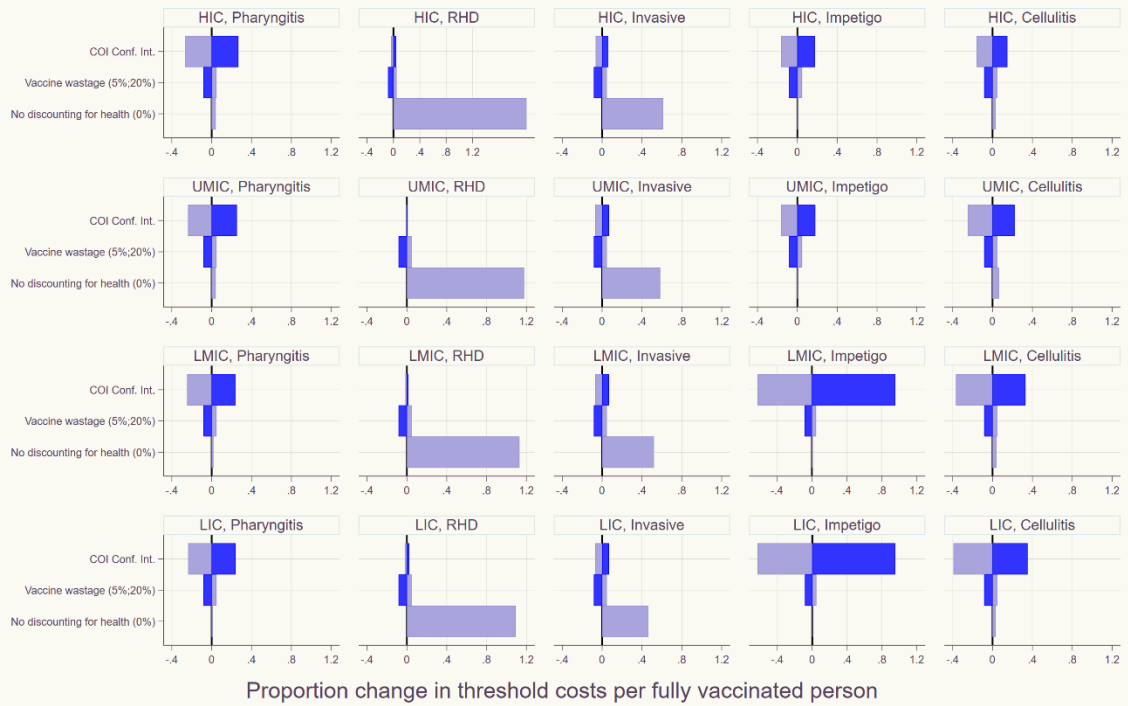

### Routine age 0 (Scenario 5)

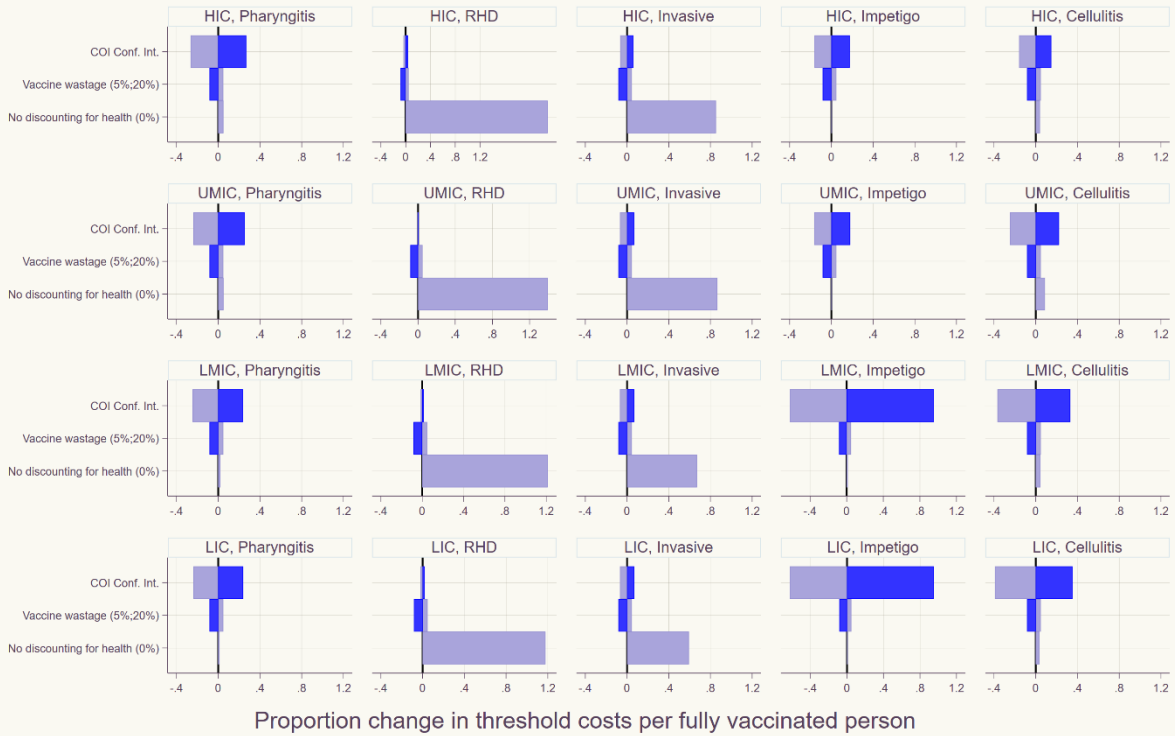

Proportion change in threshold costs per fully vaccinated person

### Routine age 0 (Scenario 6)

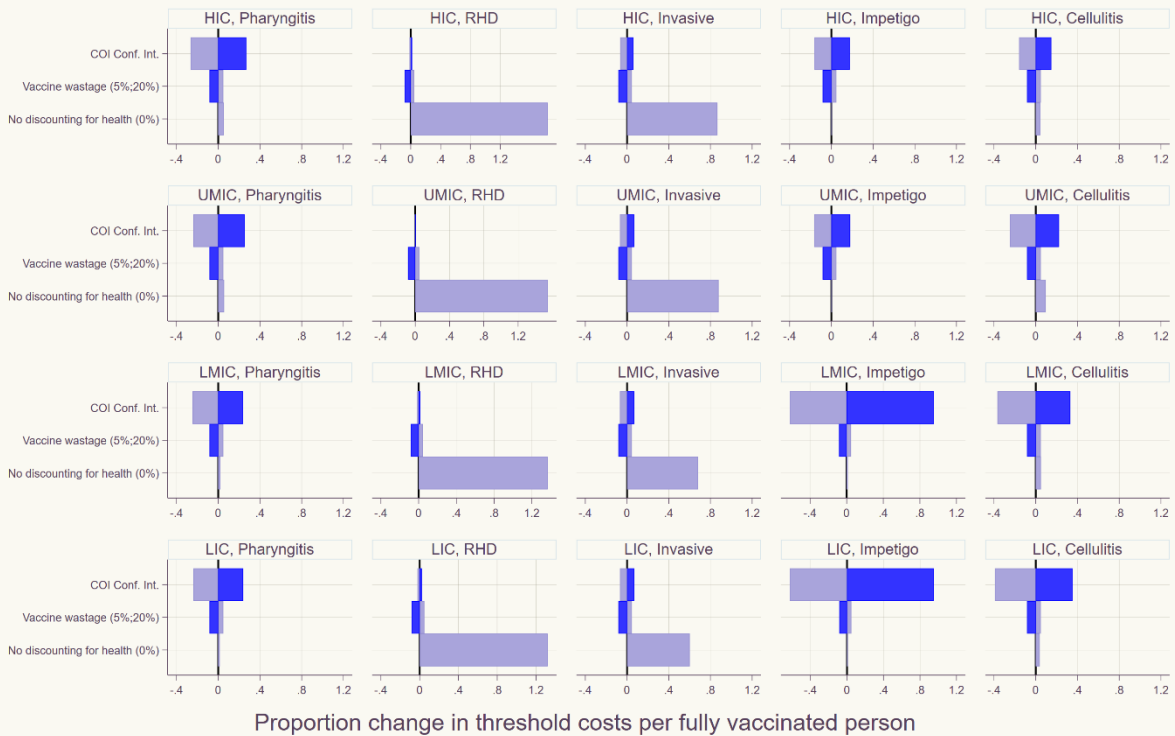

Proportion change in threshold costs per fully vaccinated person

### Routine age 5 (Scenario 1)

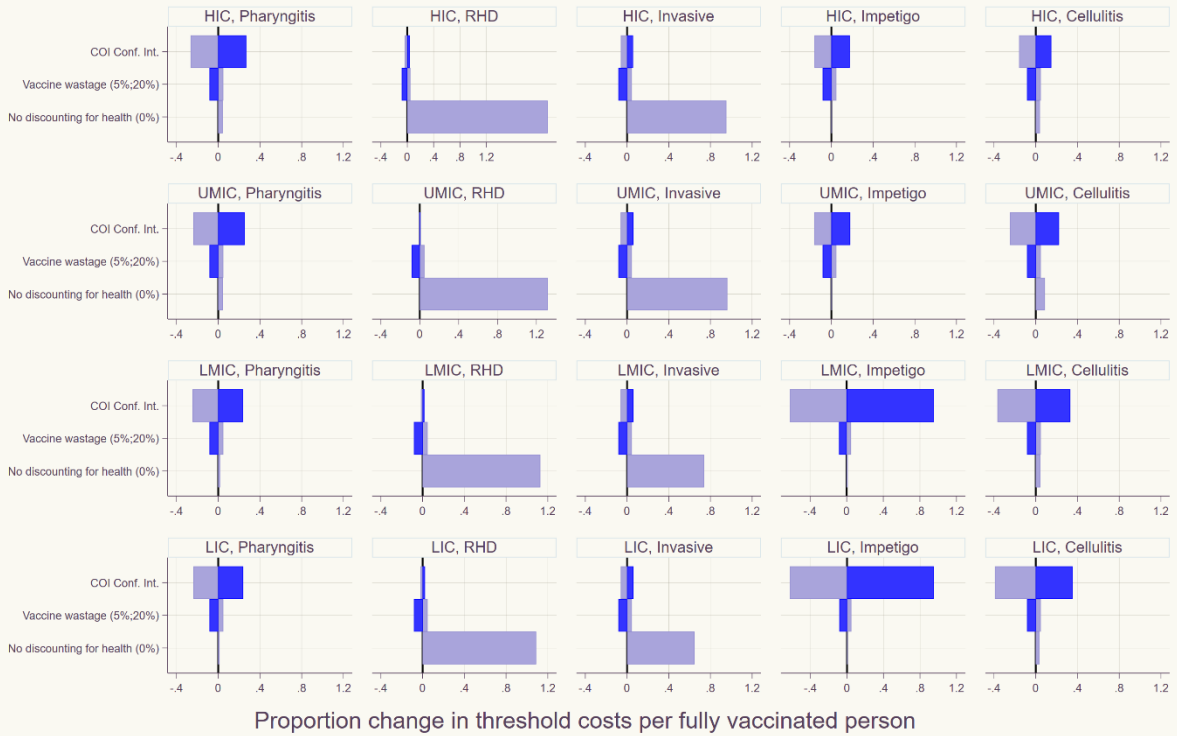

### Routine age 5 (Scenario 2)

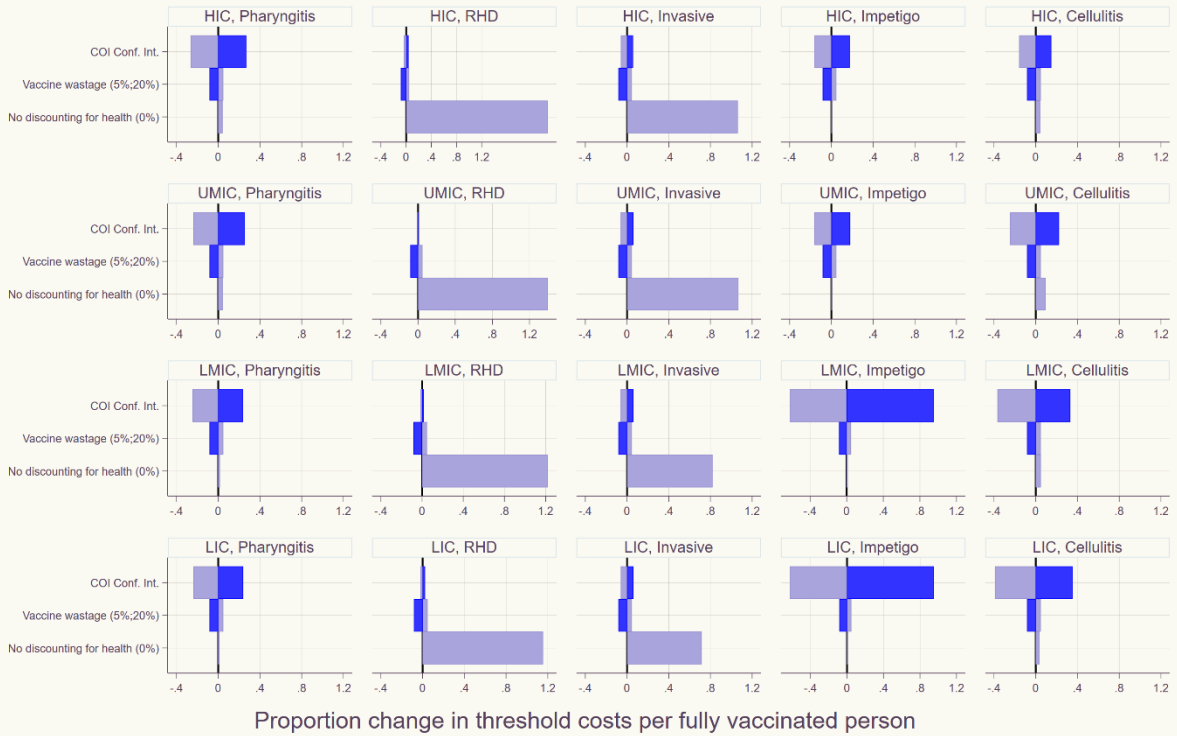

### Routine age 5 (Scenario 3)

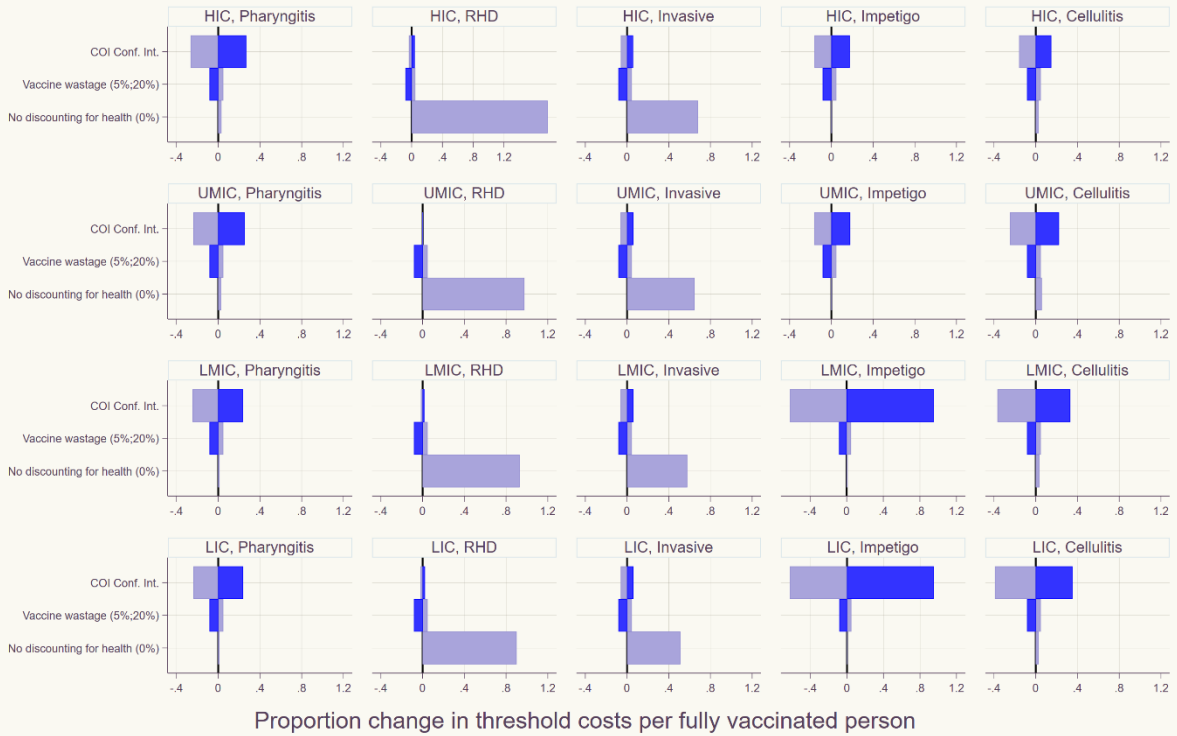

### Routine age 5 (Scenario 4)

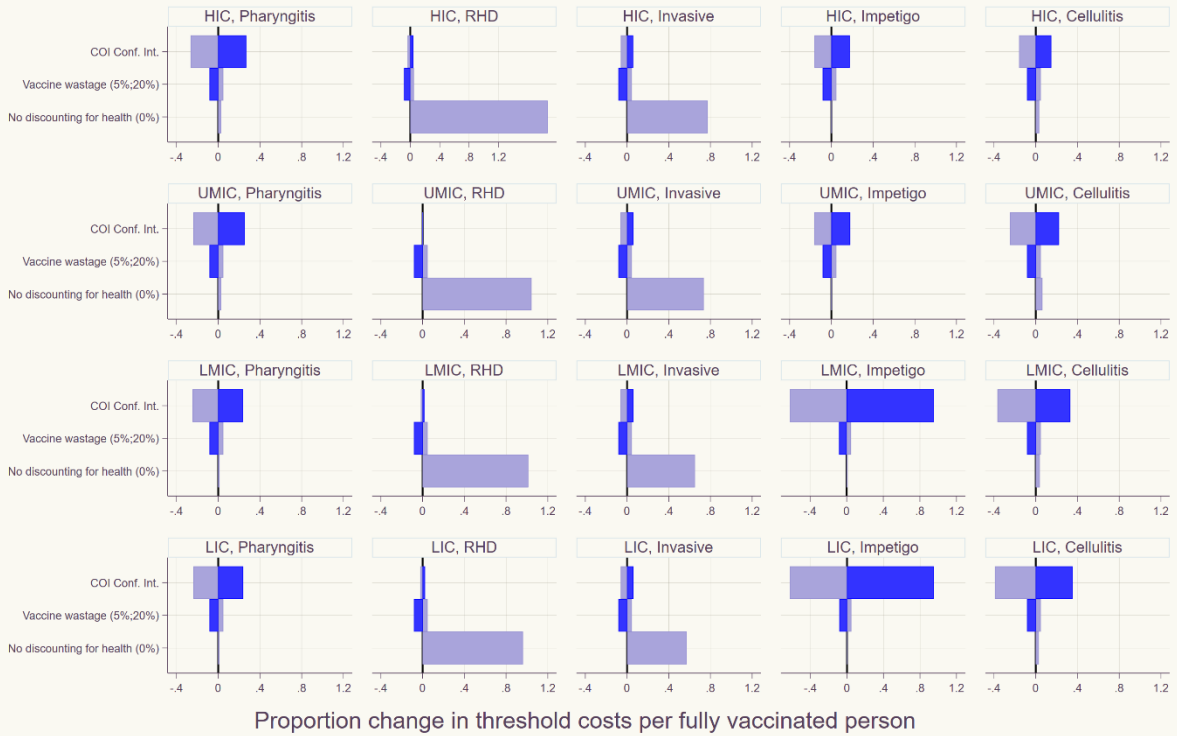

### Routine age 5 (Scenario 5)

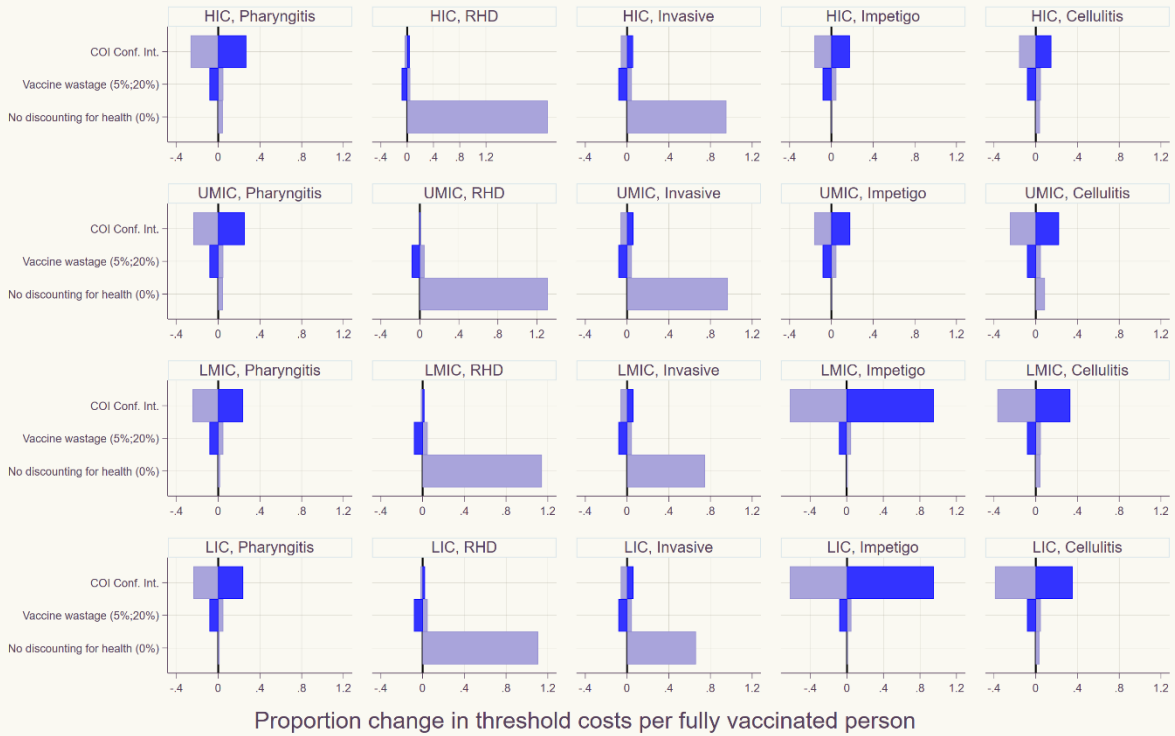

### Routine age 5 (Scenario 6)

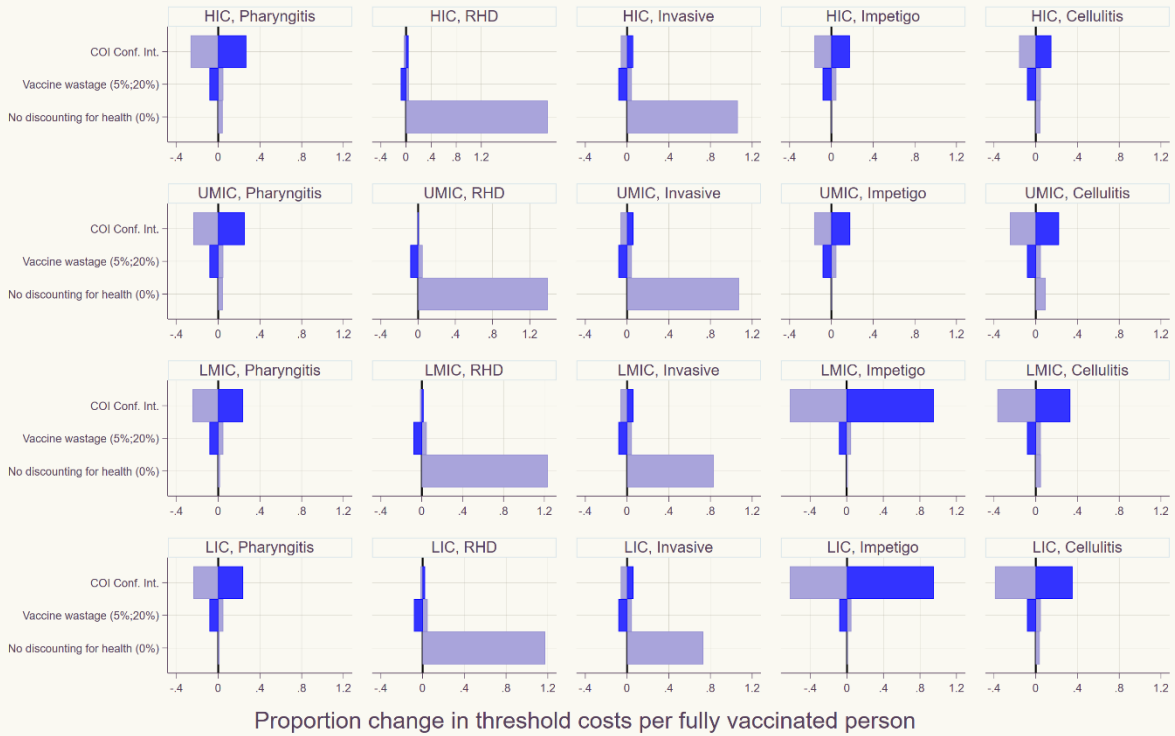

## Supplementary Figure 6. Additional multivariate analyses

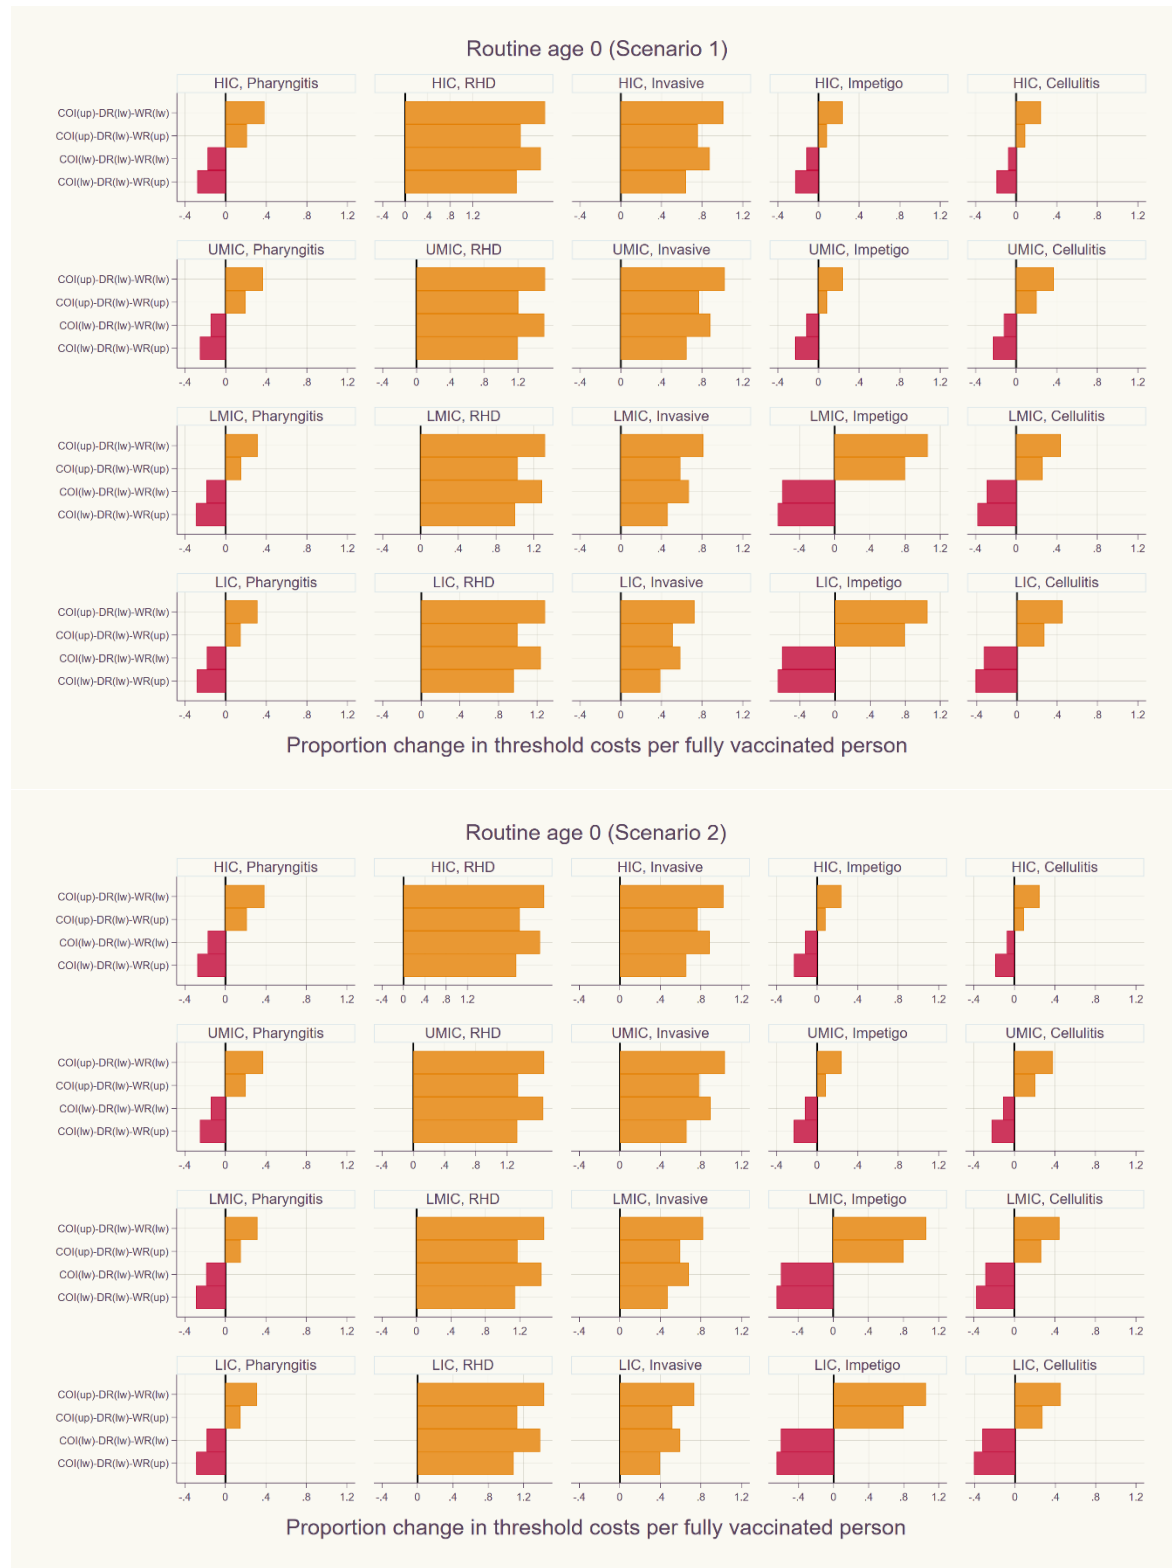

### Routine age 0 (Scenario 3)

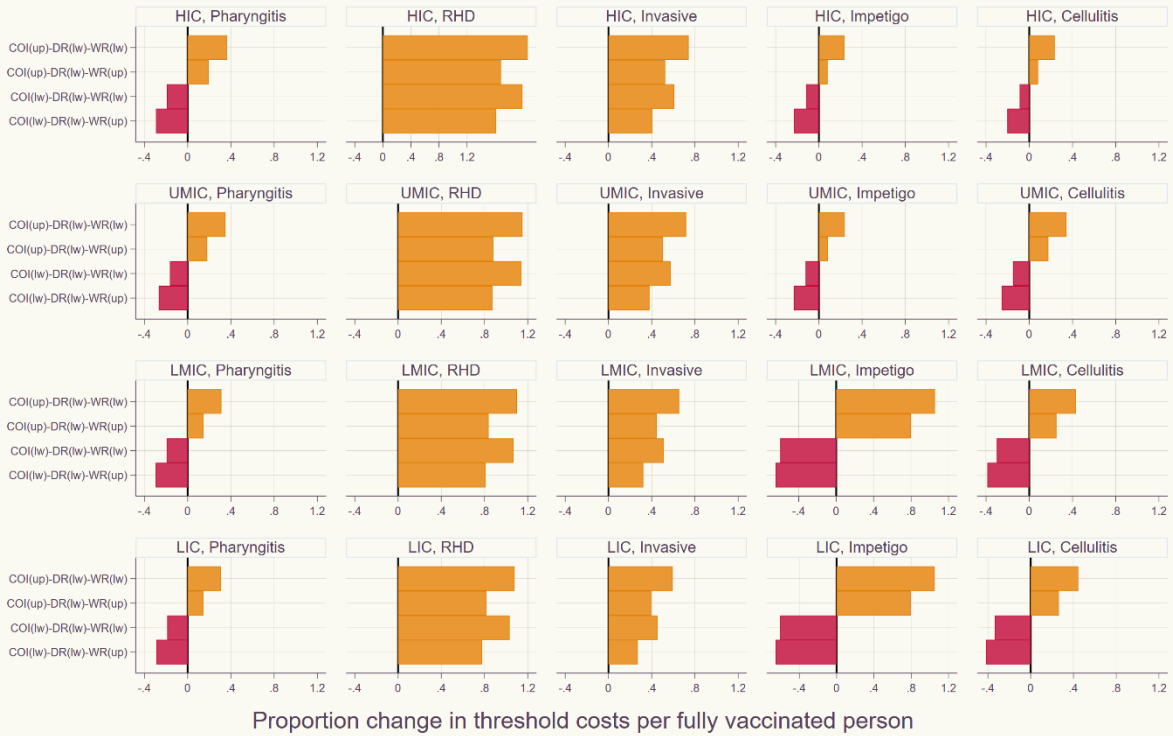

### Routine age 0 (Scenario 4)

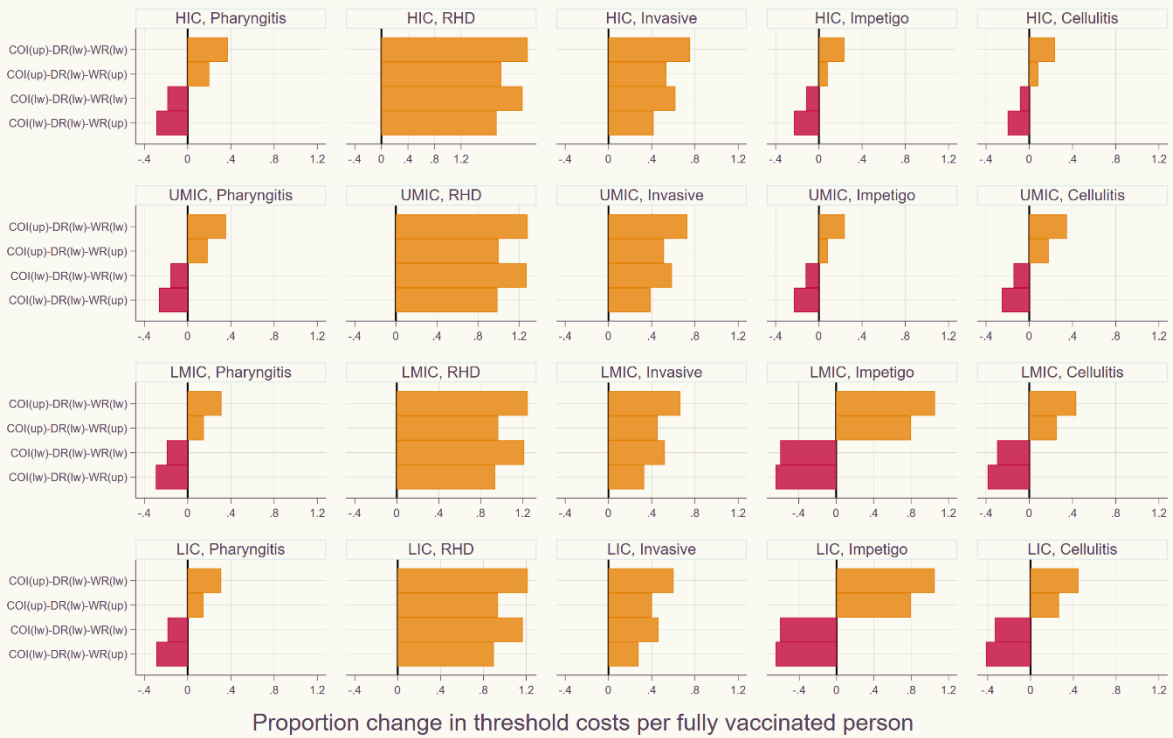

### Routine age 0 (Scenario 5)

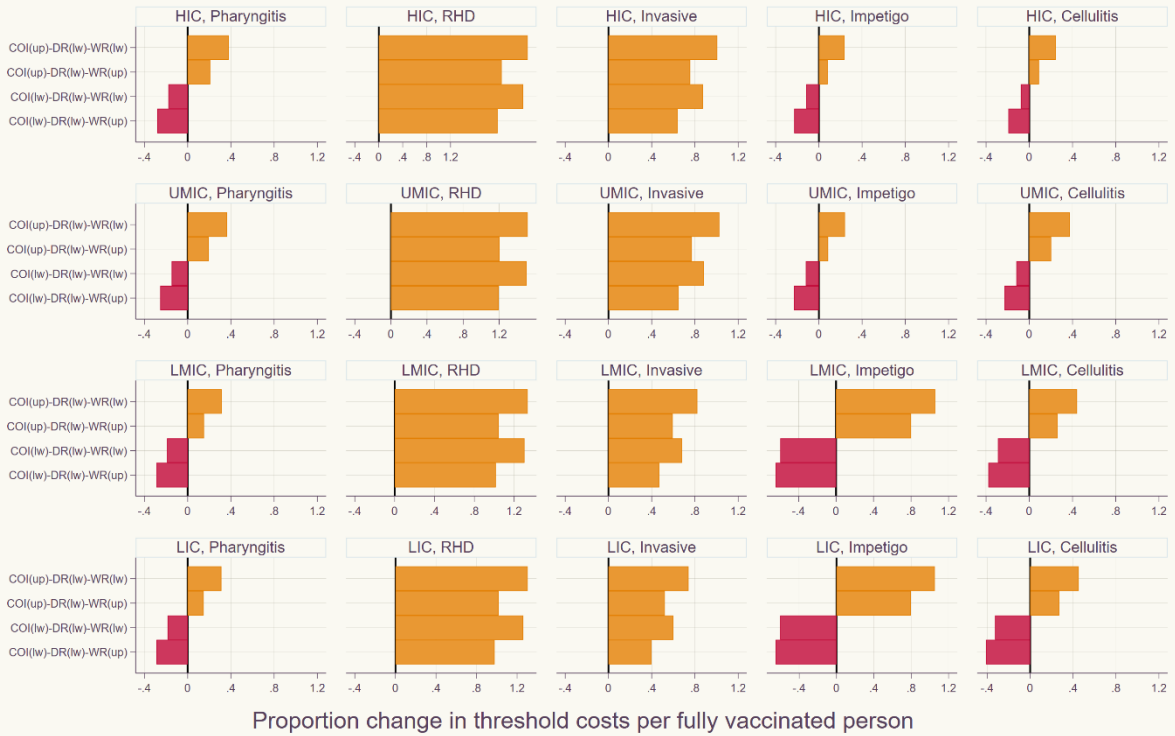

### Routine age 0 (Scenario 6)

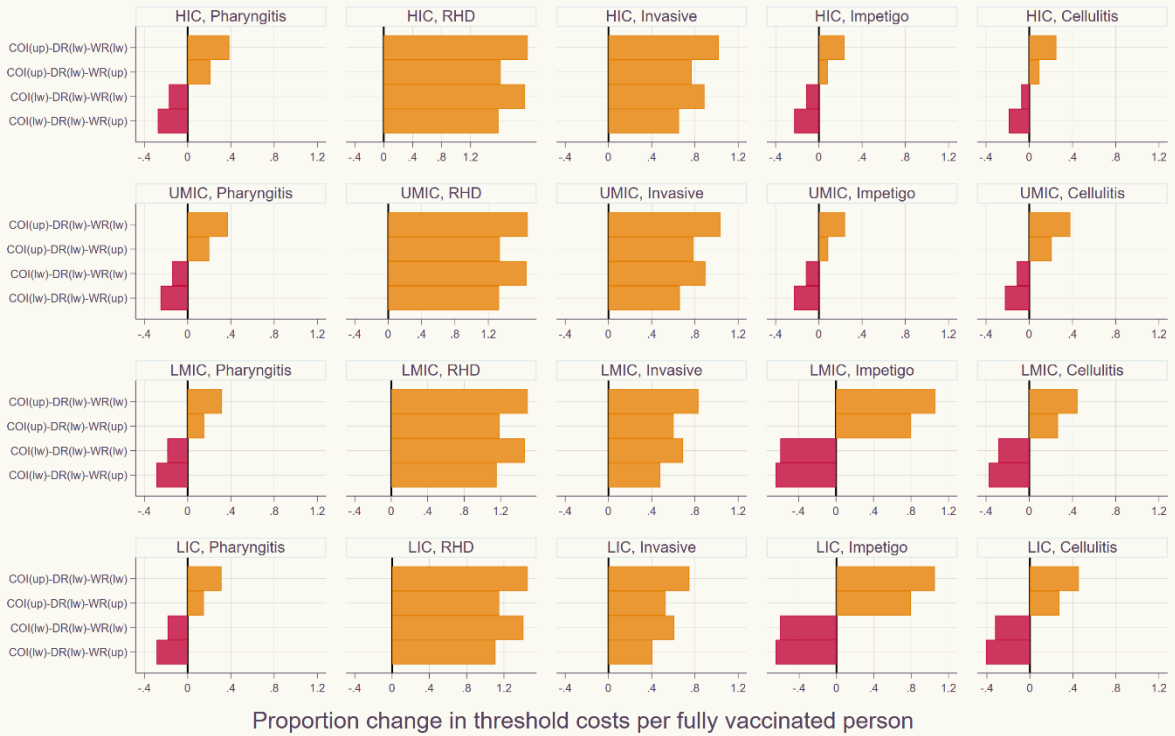



### Routine age 5 (Scenario 1)

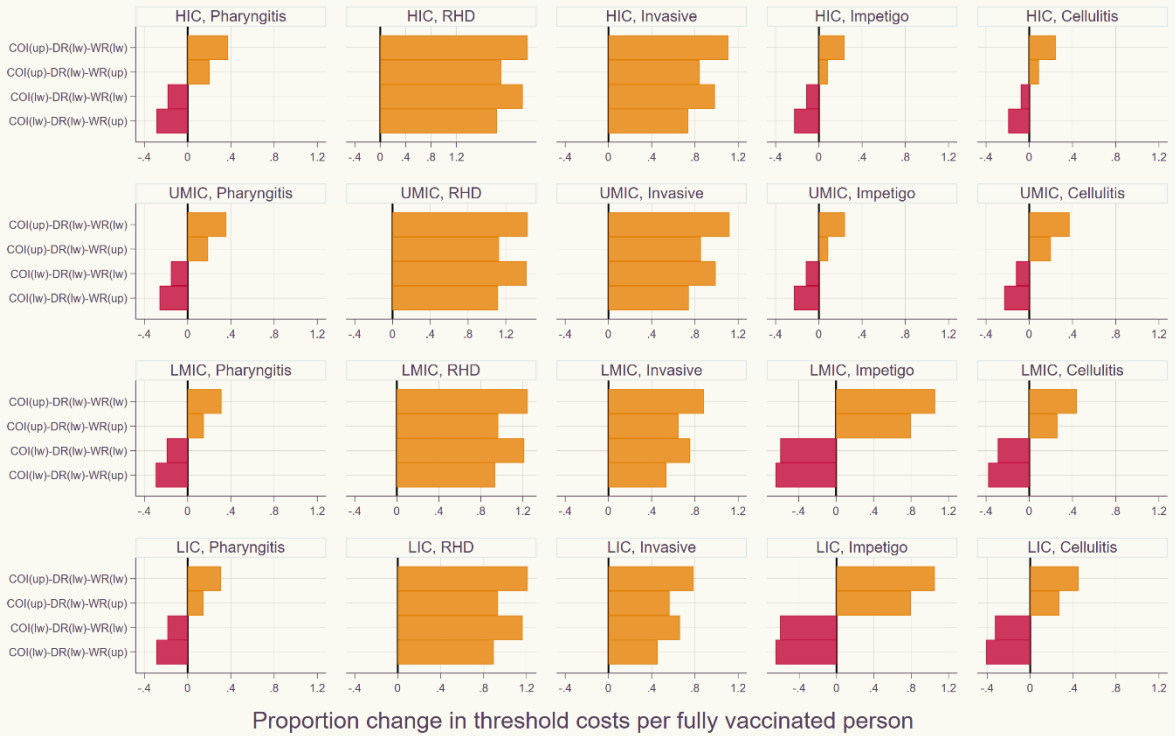

### Routine age 5 (Scenario 2)

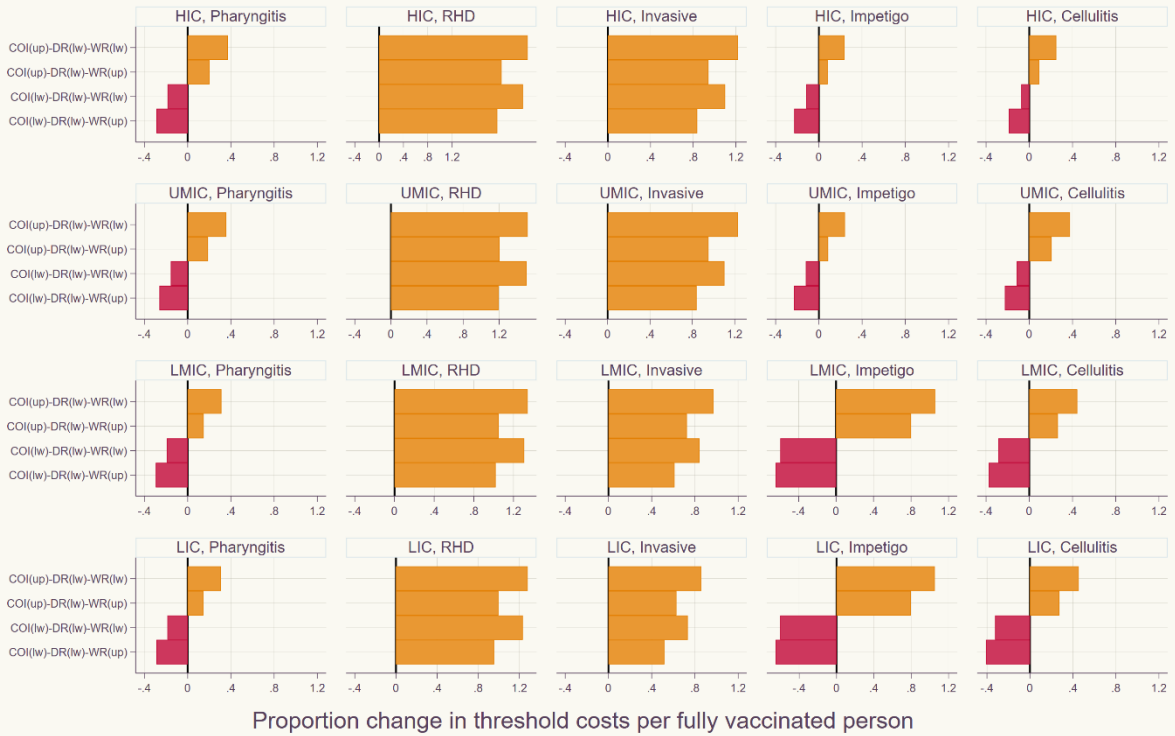

### Routine age 5 (Scenario 3)

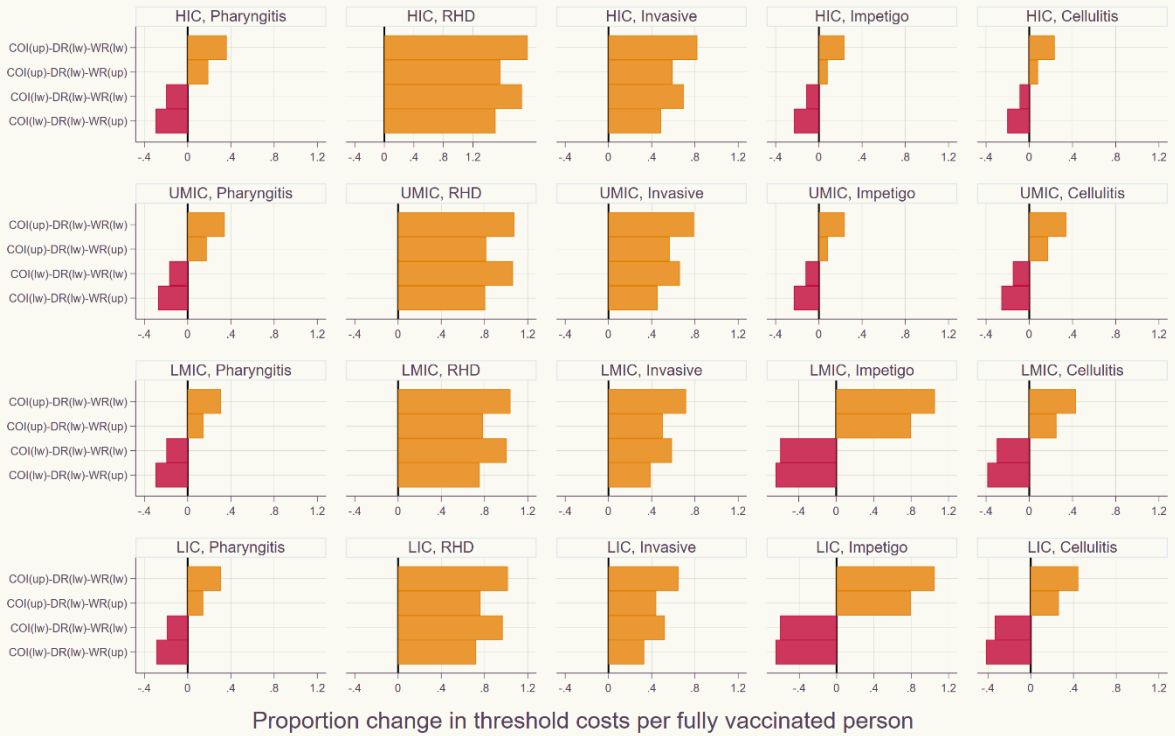

### Routine age 5 (Scenario 4)

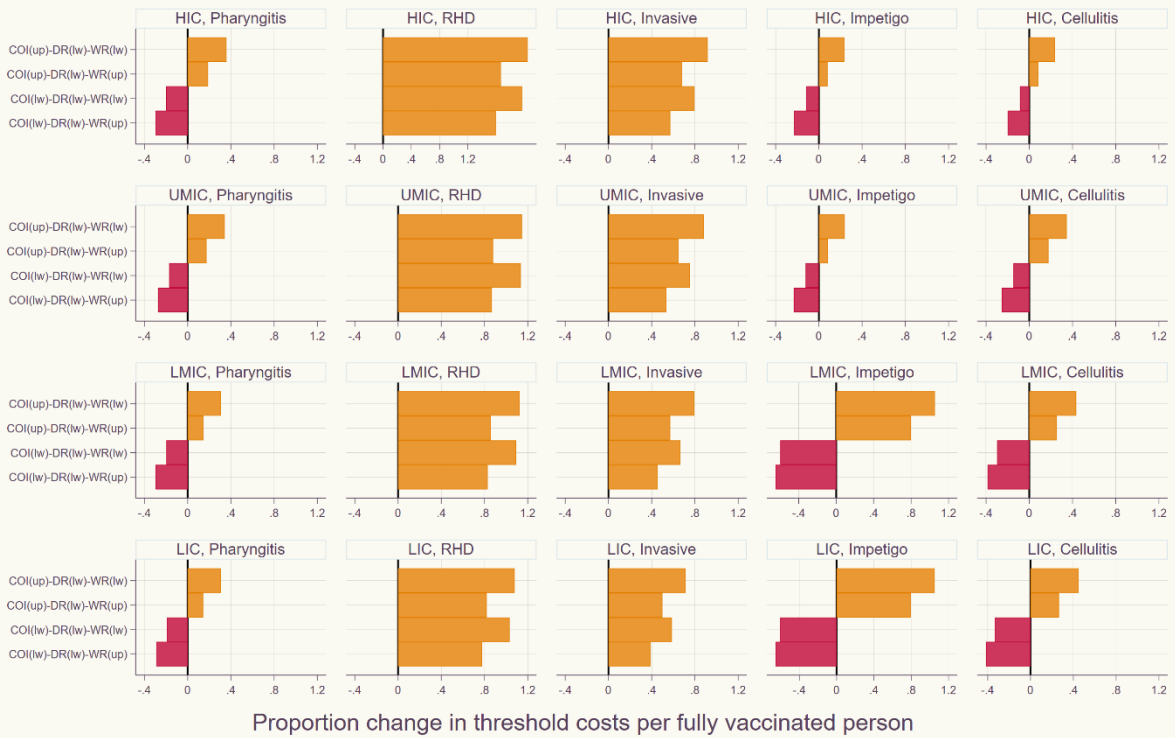

### Routine age 5 (Scenario 5)

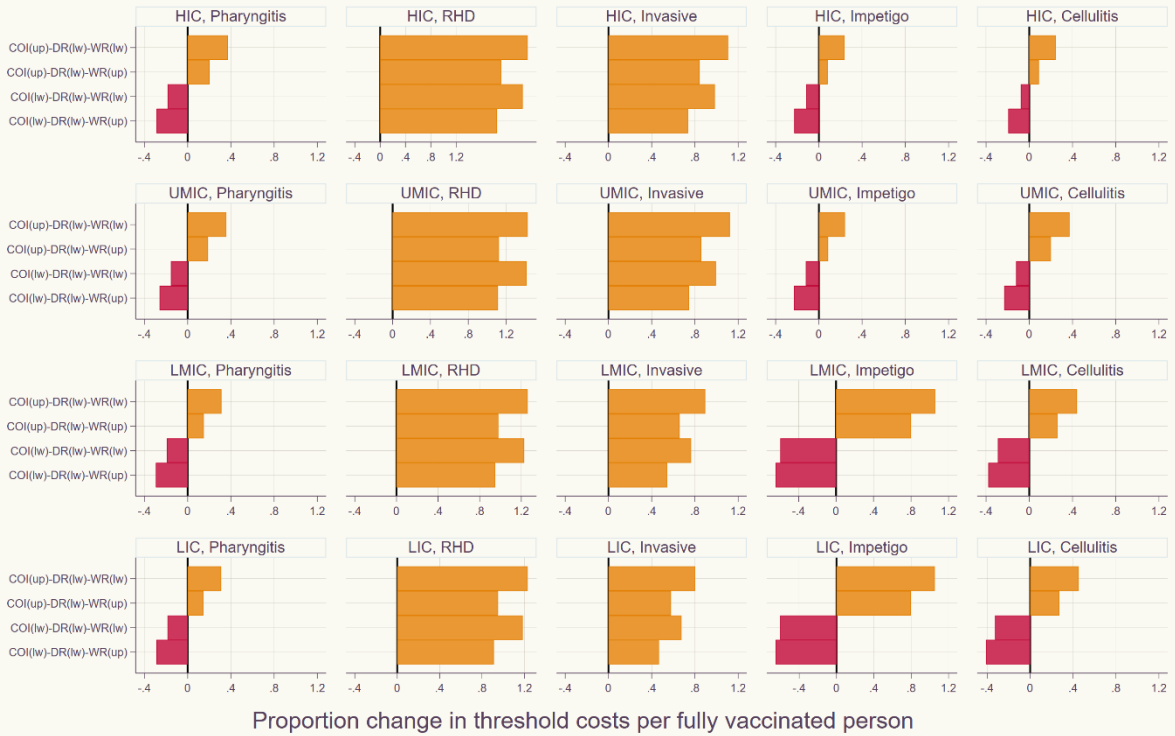

### Routine age 5 (Scenario 6)

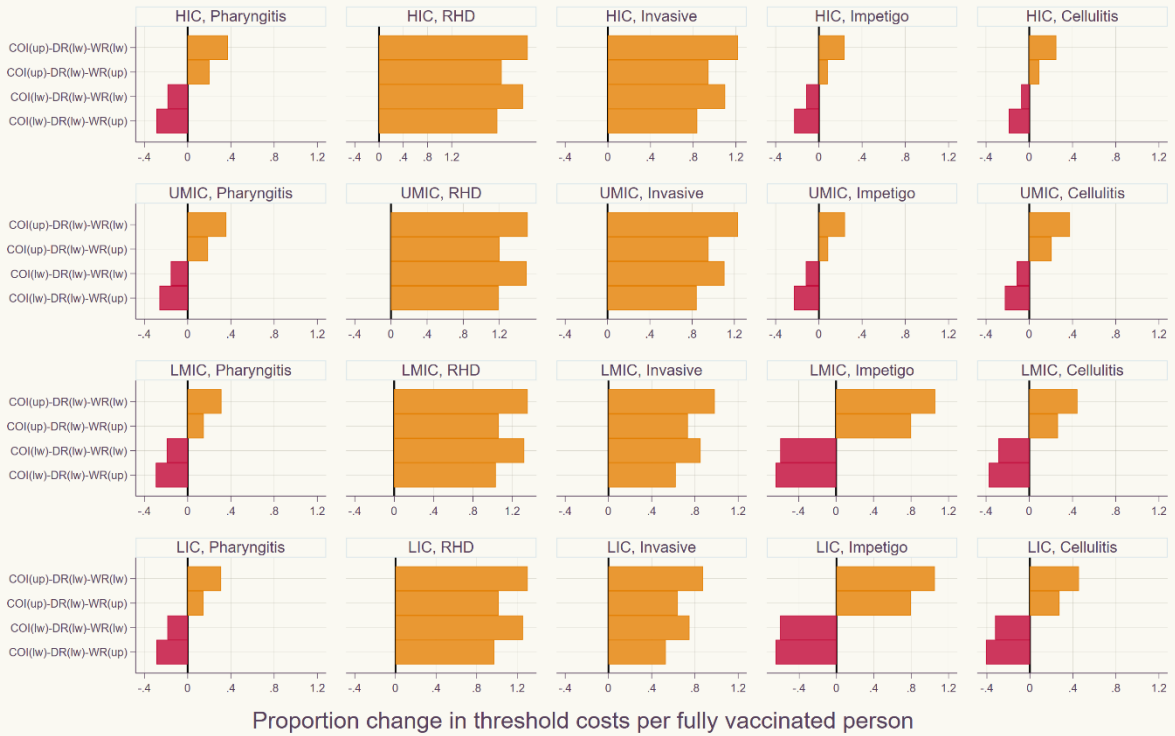

Supplement: 41541_2023_718_MOESM1_ESM.pdf [file 41541_2023_718_MOESM1_ESM.pdf]
